# Supplementary material for: Pilot-scale hydrotreating of catalytic fast pyrolysis biocrudes: process performance and product analysis
Source: Royal Society of Chemistry journal article supplement (doi:10.1039/d1se00540e), 2021-01-01

## Pilot-scale hydrotreating of catalytic fast pyrolysis biocrudes: Process performance and product analysis

Sylvain Verdier<sup>1</sup>, Ofei D. Mante<sup>2</sup>, Asger B. Hansen<sup>1</sup>, Kristoffer G. Poulsen<sup>3</sup>, Jan H. Christensen<sup>3</sup>, Nadia Ammtizboll<sup>1</sup>, Jostein Gabrielsen<sup>1</sup>, David C. Dayton<sup>2\*</sup>

1: Haldor Topsoe A/S, Haldor Topsøes Allé 1, 2800 Kgs. Lyngby, Denmark.

2: RTI International, 3040 E. Cornwallis Road, Research Triangle Park, NC 27709, USA.

3: Department of Plant and Environmental Sciences, Faculty of Science, University of Copenhagen, Thorvaldsensvej 40, 1871 Frederiksberg, Denmark

Key words: hydrotreating; biocrudes; catalytic fast pyrolysis; hydrotreating; deactivation; GC×GC.

### Supplemental Information

**Table S1: Relative area counts of groups of pooled compound classes in non-fractionated biocrudes as determined by GC×GC-FID (average of duplicate analyses).**

| CFP biocrude                                     | Feed F1 | Feed F3 | Feed F4 | Feed F5 |
|--------------------------------------------------|---------|---------|---------|---------|
| Group A (Aliphatics)                             | 11.4    | 3.5     | 3.5     | 2.2     |
| Group B (Aromatics)                              | 29.3    | 23.6    | 22.1    | 24.7    |
| Group C<br>(aliphatic acids, aldehydes, ketones) | 23.4    | 17.0    | 16.6    | 13.9    |
| Group D (furan derivatives)                      | 1.2     | 2.0     | 2.4     | 2.9     |
| Group E (non-phenolic oxygenates)                | 4.5     | 12.0    | 12.2    | 11.3    |
| Group F (phenolics)                              | 26.5    | 33.0    | 33.6    | 37.5    |
| Unknown Oxygenates                               | 3.6     | 9.0     | 9.5     | 7.5     |

**Table S2: Relative area counts of groups of pooled compound classes in the WIS THF fraction of the CFP biocrudes as determined by GC×GC-FID (average of duplicate analyses).**

| CFP biocrude                                     | Feed F1 | Feed F3 | Feed F4 | Feed F5 |
|--------------------------------------------------|---------|---------|---------|---------|
| Group A (Aliphatics)                             | 4.5     | 1.6     | 1.5     | 1.6     |
| Group B (Aromatics)                              | 30.9    | 31.1    | 29.9    | 30.1    |
| Group C<br>(aliphatic acids, aldehydes, ketones) | 9.4     | 4.7     | 4.9     | 4.9     |
| Group D (furan derivatives)                      | 0.6     | 0.8     | 1.0     | 1.3     |
| Group E (non-phenolic oxygenates)                | 17.1    | 20.9    | 21.4    | 19.3    |
| Group F (phenolics)                              | 19.7    | 24.3    | 25.3    | 28.4    |
| Unknowns Oxygenates                              | 17.7    | 16.6    | 16.1    | 14.3    |

**Table S3: Properties of biocrude F4 and the HDT products obtained during pilot plant Exp. A (WIS-THF fractions)**

| Run hour                                                      | 0 (Feed F4) | 12      | 26      | 42      | 73      | 102     |
|---------------------------------------------------------------|-------------|---------|---------|---------|---------|---------|
| S, wt% (D4294)                                                | 0.01018     | 0.01204 | 0.00171 | 0.00181 | 0.00188 | 0.00195 |
| N, wt ppm (D5762)                                             | 966.94      | -       | -       | -       | -       | -       |
| N, wt ppm (D4629)                                             | -           | 397.99  | 1021.28 | 1373.07 | 1366.9  | 1371.01 |
| H, wt% (D7171)                                                | 7.02        | 11.98   | 11.75   | 11.02   | 10.2    | 9.94    |
| O, wt% (elemental)                                            | 28          | -       | 3.08    | 5.2     | 8       | 9.22    |
| C, wt% (elemental)                                            | 62.9        | -       | 84.5    | 85.4    | 83.2    | 82.8    |
| SG 60/60°F                                                    | -           | 0.8965  | 0.9159  | 0.9469  | 0.9837  | 0.9953  |
| Viscosity at 50°C, cSt                                        | -           | 2.723   | 4.784   | 8.568   | 18.958  | 24.228  |
| <b>Simulated Distillation</b>                                 |             |         |         |         |         |         |
| 0.5 wt% (IBP), °C                                             | 86          | 73      | 80      | 75      | 59      | 58      |
| 5 wt%, °C                                                     | 147         | 101     | 102     | 110     | 122     | 125     |
| 10 wt%, °C                                                    | 175         | 129     | 131     | 136     | 154     | 155     |
| 30 wt%, °C                                                    | 238         | 179     | 199     | 208     | 220     | 222     |
| 50 wt%, °C                                                    | 292         | 261     | 293     | 299     | 307     | 310     |
| 70 wt%, °C                                                    | 361         | 326     | 352     | 361     | 372     | 380     |
| 80 wt%, °C                                                    | 397         | 359     | 402     | 418     | 437     | 450     |
| 90 wt%, °C                                                    | 450         | 435     | 488     | 503     | 519     | 530     |
| 95 wt%, °C                                                    | 492         | 504     | 544     | 555     | 565     | 573     |
| 99.5 wt% (FBP), °C                                            | 564         | 602     | 607     | 609     | 610     | 611     |
| <b>Group characterization by GC×GC -FID (WIS-THF)(%-area)</b> |             |         |         |         |         |         |
| Group A (Aliphatics)                                          | 1.5         | 22.6    | -       | -       | 6.7     | 8.7     |
| Group B (Aromatics)                                           | 29.9        | 64.2    | -       | -       | 50.7    | 51.1    |
| Group C (aliphatic acids, aldehydes, ketones)                 | 4.9         | 0.3     | -       | -       | 0.9     | 0.9     |
| Group D (furan derivatives)                                   | 17.0        | N.D.    | -       | -       | N.D.    | N.D.    |
| Group E (non-phenolic oxygenates)                             | 21.4        | 1.8     | -       | -       | 9.5     | 8.9     |
| Group F (phenolics)                                           | 25.3        | 11      | -       | -       | 32      | 29.7    |
| Unknown oxygenates                                            | 16.1        | 0       | -       | -       | 0       | 0       |

**Table S4: Properties of biocrude F3 and the HDT products obtained during pilot plant Exp. B (WIS-THF fractions)**

| Run hour                                                       | 0 (Feed F3) | 12     | 28     | 44     | 60     | 76     | 108    | 116    | 145.5  |
|----------------------------------------------------------------|-------------|--------|--------|--------|--------|--------|--------|--------|--------|
| S, wt% (D4294)                                                 | 0.01081     | -      | -      | -      | -      | -      | -      | -      | -      |
| N, wt ppm (D5762)                                              | 987         | -      | -      | -      | -      | -      | -      | -      | -      |
| N, wt ppm (D4629)                                              | -           | 140    | 505    | 759    | 1169   | 1242   | 1278   | 1295   | 1200   |
| H, wt% (D7171)                                                 | 7.35        | 12.8   | 11.57  | 10.83  | 10.48  | 10.34  | 10.05  | 10.01  | 9.94   |
| O, wt% (elemental)                                             | 25.5        | 1.71   | 3.18   | 5.07   | 6.09   | 6.77   | 7.86   | 7.79   | 7.85   |
| C, wt% (elemental)                                             | 64.5        | 83.7   | 84.9   | 83.0   | 82.5   | 82.7   | 82     | 81.8   | 81.7   |
| SG 60/60°F                                                     | -           | 0.8651 | 0.9126 | 0.9418 | 0.9569 | 0.9659 | 0.9777 | 0.9802 | 0.9838 |
| Moisture content (wt%)                                         | 9.35        | -      | -      | -      | -      | -      | -      | -      | -      |
| Viscosity at 50°C, cSt                                         | -           | 1.911  | 3.609  | 5.593  | 7.334  | 9.047  | 11.035 | 11.373 | 12.253 |
| <b>Simulated Distillation</b>                                  |             |        |        |        |        |        |        |        |        |
| 0.5 wt% (IBP), °C                                              | 85          | 74     | 73     | 89     | 70     | 72     | 89     | 70     | 90     |
| 5 wt%, °C                                                      | 143         | 101    | 93     | 125    | 75     | 81     | 131    | 76     | 141    |
| 10 wt%, °C                                                     | 173         | 116    | 123    | 154    | 79     | 131    | 159    | 82     | 168    |
| 30 wt%, °C                                                     | 234         | 165    | 191    | 212    | 183    | 207    | 223    | 201    | 224    |
| 50 wt%, °C                                                     | 288         | 230    | 269    | 283    | 253    | 276    | 291    | 268    | 297    |
| 70 wt%, °C                                                     | 360         | 302    | 338    | 348    | 339    | 350    | 359    | 350    | 359    |
| 80 wt%, °C                                                     | 394         | 326    | 370    | 383    | 373    | 387    | 398    | 387    | 396    |
| 90 wt%, °C                                                     | 445         | 372    | 446    | 458    | 452    | 464    | 474    | 465    | 470    |
| 95 wt%, °C                                                     | 486         | 427    | 503    | 511    | 510    | 517    | 523    | 518    | 521    |
| 99.5 wt% (FBP), °C                                             | 558         | 565    | 576    | 577    | 578    | 578    | 579    | 578    | 579    |
| <b>Group characterization by GC×GC –FID (WIS-THF) (%-area)</b> |             |        |        |        |        |        |        |        |        |
| Group A (Aliphatics)                                           | 1.6         | 45.5   | 20.1   | -      | -      | -      | 7.8    | 6.8    | 8.1    |
| Group B (Aromatics)                                            | 31.1        | 43.4   | 61.3   | -      | -      | -      | 47.3   | 48.4   | 49.6   |
| Group C<br>(aliphatic acids, aldehydes,<br>ketones)            | 4.7         | 0.5    | 0.3    | -      | -      | -      | 0.5    | 0.4    | 0.3    |
| Group D (Furan derivatives)                                    | 0.8         | N.D.   | N.D.   | -      | -      | -      | N.D.   | N.D.   | N.D.   |
| Group E (non-phenolic oxygenates)                              | 20.9        | 3.1    | 3.3    | -      | -      | -      | 10.3   | 11.4   | 9.4    |
| Group F (phenolics)                                            | 24.3        | 7.3    | 14.6   | -      | -      | -      | 33.8   | 32.8   | 32.3   |
| Unknown O's                                                    | 16.6        | 0      | 0      | -      | -      | -      | 0      | 0      | 0      |

**Table S5: Properties of biocrude F1 and the HDT products obtained during pilot plant Exp. C (WIS-THF fractions)**

| Run hour                                                | 0 (Feed F1) | 8       | 40       | 64      | 72       | 84       | 116     |
|---------------------------------------------------------|-------------|---------|----------|---------|----------|----------|---------|
| S, wt% (D4294)                                          | 0.027       | 0.00627 | 0.000418 | 0.00065 | 0.000501 | 0.000405 | 0.00075 |
| N, wt ppm (D5762)                                       | 708         | 5       | 62       | 217     | 254      | 296      | 350     |
| H, wt% (D7171)                                          | 8.3         | 13.66   | 12.81    | 12.32   | 12.25    | 12.16    | 12.07   |
| O, wt% (elemental)                                      | 17          | 0.25    | 0.54     | 1.29    | 1.38     | 1.59     | 1.66    |
| C, wt% (elemental)                                      | 73.9        | 83.9    | 84.1     | 84.8    | 83.3     | 83.5     | 84.8    |
| SG 60/60°F                                              |             | 0.8304  | 0.8435   | 0.8584  | 0.8608   | 0.8635   | 0.8675  |
| Moisture content (wt%)                                  | 8           |         |          |         |          |          |         |
| Viscosity at 60°C, cSt                                  |             | 1.216   | 1.152    | 1.233   | 1.245    | 1.266    | 1.298   |
| <b>Simulated Distillation</b>                           |             |         |          |         |          |          |         |
| 0.5 wt% (IBP), °C                                       |             | 67.8    | 55.6     | 56.8    | 56.8     | 58.6     | 57.6    |
| 5 wt%, °C                                               | 123         | 104     | 88       | 91      | 90       | 90       | 92      |
| 10 wt%, °C                                              | 143         | 131     | 101      | 109     | 104      | 105      | 110     |
| 30 wt%, °C                                              | 188         | 166     | 158      | 166     | 165      | 166      | 168     |
| 50 wt%, °C                                              | 220         | 199     | 201      | 208     | 207      | 208      | 210     |
| 70 wt%, °C                                              | 272         | 259     | 271      | 276     | 274      | 274      | 277     |
| 80 wt%, °C                                              | 328         | 292     | 313      | 317     | 316      | 317      | 319     |
| 90 wt%, °C                                              | 394         | 321     | 361      | 370     | 369      | 371      | 372     |
| 95 wt%, °C                                              | 450         | 354     | 416      | 425     | 424      | 428      | 426     |
| 99.5 wt% (FBP), °C                                      | 554         | 431     | 530      | 548     | 542      | 553      | 539     |
| Group characterization by GC×GC -FID (WIS-THF) (%-area) |             |         |          |         |          |          |         |
| Group A (Aliphatics)                                    | 4.5         | 88.8    | -        | -       | -        | -        | 29.1    |
| Group B (Aromatics)                                     | 30.9        | 7.8     | -        | -       | -        | -        | 31.4    |
| Group C<br>(aliphatic acids, aldehydes, ketones)        | 9.4         | 0.4     | -        | -       | -        | -        | 0.2     |
| Group D (Furan derivatives)                             | 0.6         | N.D.    | -        | -       | -        | -        | N.D.    |
| Group E (non-phenolic oxygenates)                       | 17.1        | 1.7     | -        | -       | -        | -        | 1.9     |
| Group F (phenolics)                                     | 19.7        | 1.2     | -        | -       | -        | -        | 7.4     |
| Unknown Os                                              | 17.7        | 0       | -        | -       | -        | -        | 0       |

**Table S6: Properties of biocrude F5 and the HDT products obtained during pilot plant Exp. D (WIS-THF fractions)**

| Run hour                                                       | 0 (Feed F5) | 12      | 28     | 36       | 60      |
|----------------------------------------------------------------|-------------|---------|--------|----------|---------|
| S, wt% (D4294)                                                 | 0.00582     | 0.00951 |        | 0.003008 | 0.00353 |
| N, wt ppm (D5762)                                              | -           | 304     | 1231   | 1168     |         |
| H, wt% (D7171)                                                 | 6.49        | 12.65   | 10.96  | 10.41    | 9.85    |
| O, wt% (elemental)                                             | 28.75       | 1.21    | 4.84   | 7.22     | 8.91    |
| C, wt% (elemental)                                             | 62.6        | 83.8    | 83.8   | 80.3     | 78.2    |
| SG 60/60°F                                                     | -           | 0.8768  | 0.9518 | 0.9716   | 0.9957  |
| Moisture content (wt%)                                         | 10.38       | -       | -      | -        | -       |
| Viscosity at 60°C, cSt                                         | -           | 2.143   | 8.635  | 11.294   | 16.183  |
| Simulated Distillation                                         |             |         |        |          |         |
| 0.5 wt% (IBP), °C                                              |             | 58      | 66     | 63       | 69      |
| 5 wt%, °C                                                      |             | 100     | 115    | 81       | 105     |
| 10 wt%, °C                                                     |             | 129     | 146    | 114      | 138     |
| 30 wt%, °C                                                     |             | 193     | 228    | 210      | 223     |
| 50 wt%, °C                                                     |             | 262     | 305    | 297      | 307     |
| 70 wt%, °C                                                     |             | 327     | 382    | 377      | 381     |
| 80 wt%, °C                                                     |             | 365     | 436    | 438      | 443     |
| 90 wt%, °C                                                     |             | 427     | 502    | 512      | 516     |
| 95 wt%, °C                                                     |             | 478     | 544    | 555      | 558     |
| 99.5 wt% (FBP), °C                                             |             | 584     | 605    | 607      | 607     |
| <b>Group characterization by GC×GC -FID (WIS-THF) (%-area)</b> |             |         |        |          |         |
| Group A (Aliphatics)                                           | 1.6         | 44.7    | 22.0   | 14.1     | 6.0     |
| Group B (Aromatics)                                            | 30.1        | 47.0    | 53.6   | 52.5     | 49.2    |
| Group C<br>(aliphatic acids, aldehydes, ketones)               | 4.9         | 0.4     | 0.4    | 0.6      | 0.6     |
| Group D (Furan derivatives)                                    | 1.3         | N.D.    | N.D.   | N.D.     | N.D.    |
| Group E (non-phenolic oxygenates)                              | 19.3        | 1.5     | 4.7    | 6.1      | 10.6    |
| Group F (phenolics)                                            | 28.4        | 6.3     | 19.1   | 26.6     | 33.2    |
| Unknown Os                                                     | 14.3        | 0       | 0      | 0        | 0       |

Figure S1:  $^{13}\text{C}$ -NMR spectrum of biocrude F1

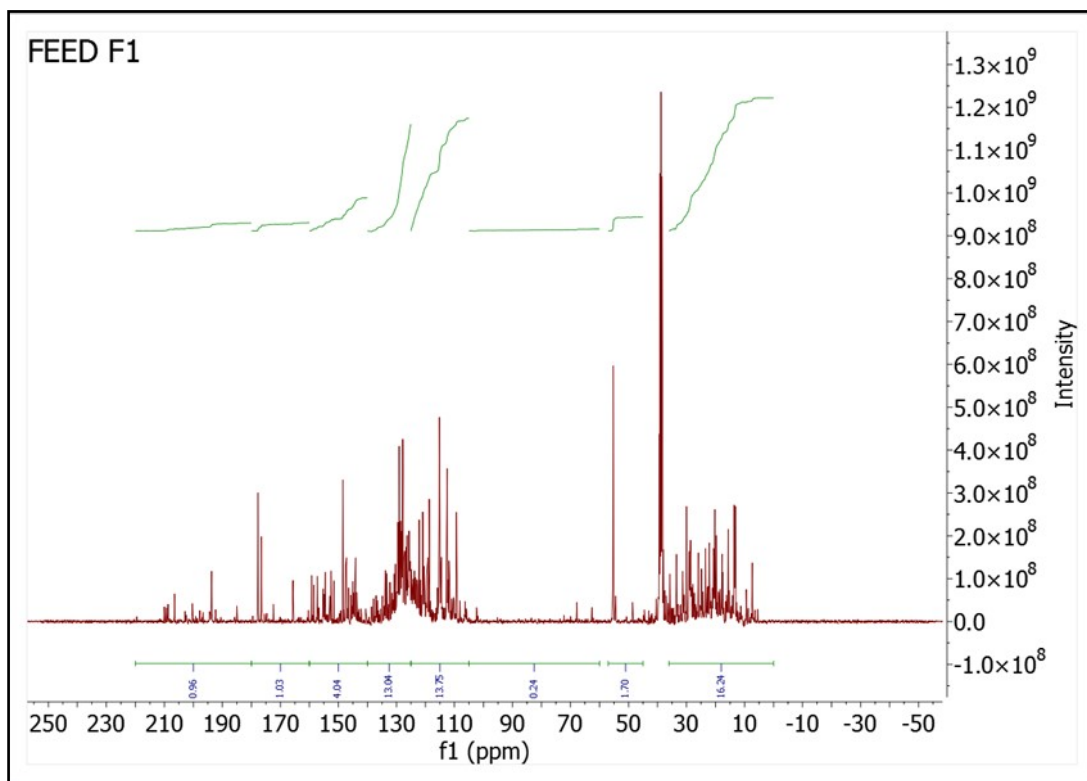

Figure S2:  $^{13}\text{C}$ -NMR spectrum of biocrude F3

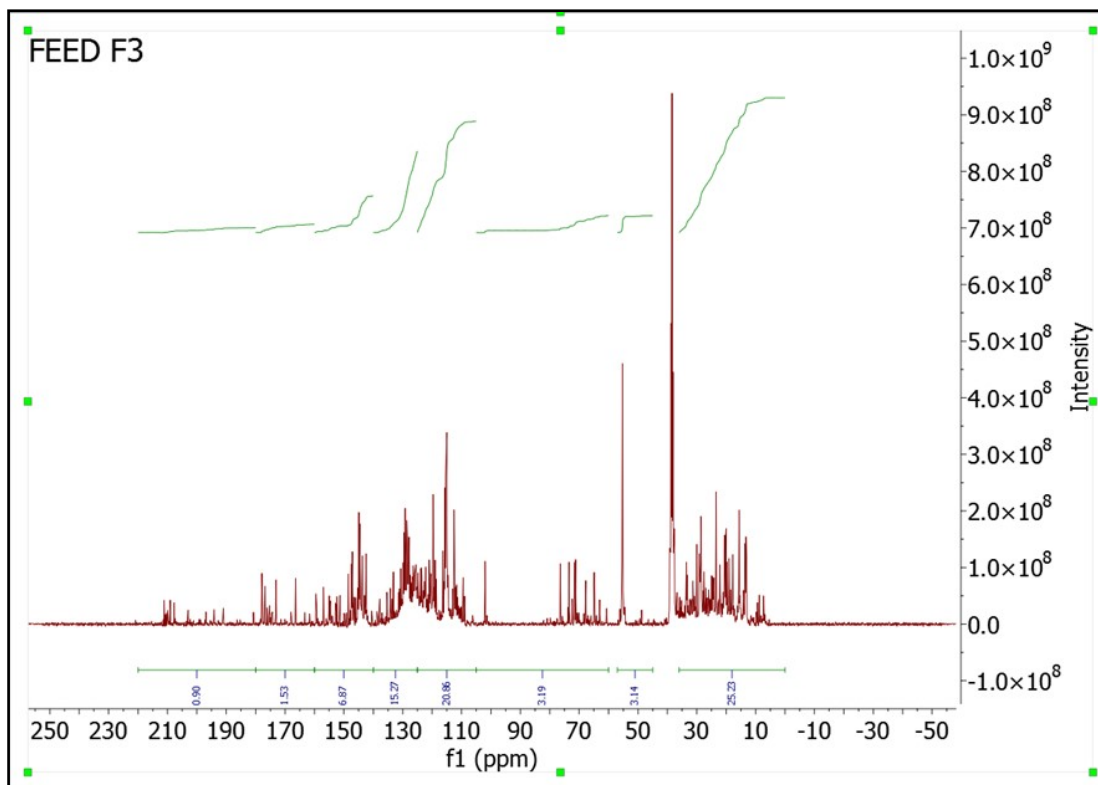

Figure S3:  $^{13}\text{C}$ -NMR spectrum of biocrude F4

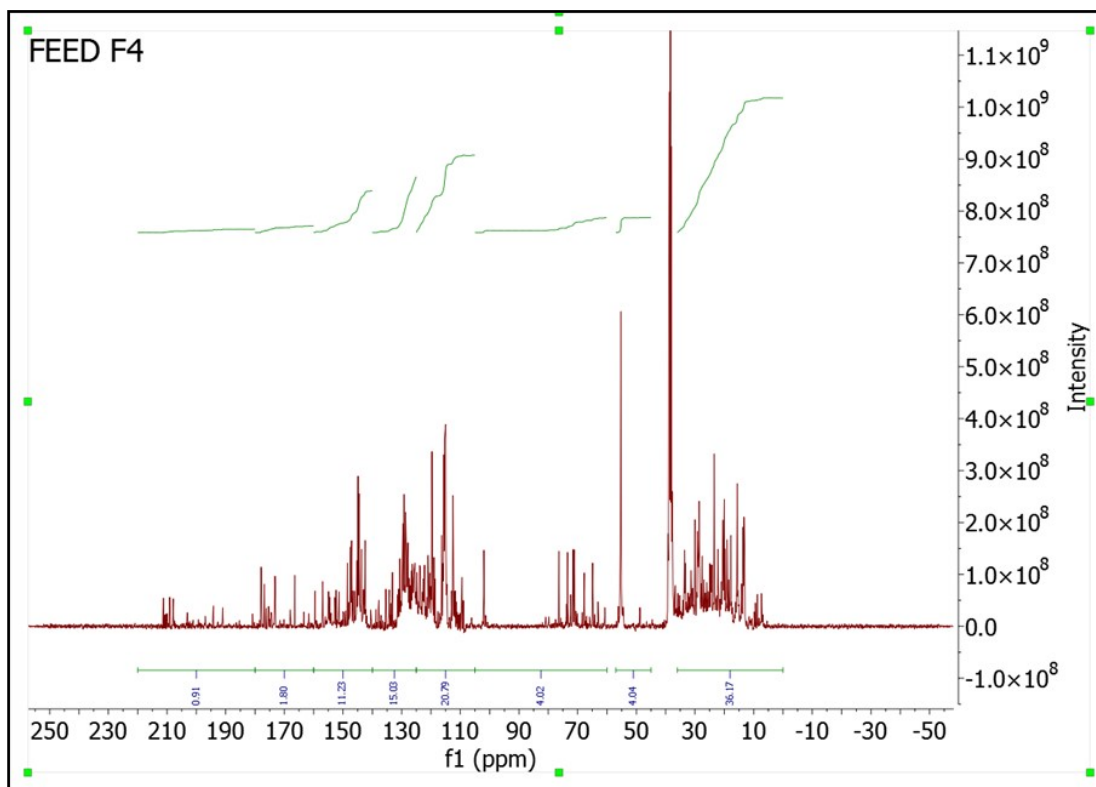

Figure S4:  $^{13}\text{C}$ -NMR spectrum of biocrude F5

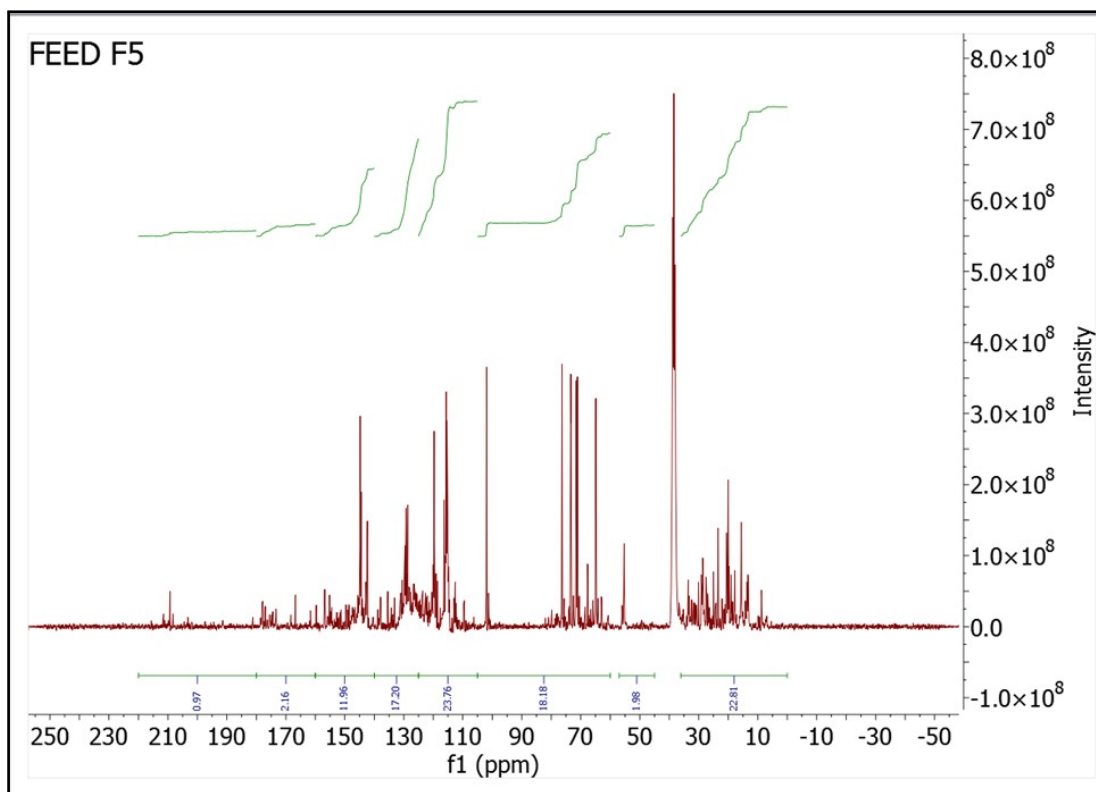

Supplement: d1se00540e1.pdf [file d1se00540e1.pdf]
